# Supplementary material
Source: HighWire-hosted journal article supplement (doi:10.1101/rna.079219.122)
Supplement: Supplemental_Table1.xlsx [file Supplemental_Table1.xlsx]

## Sheet: Sheet1
Northern oligonucleotide probe
	Target	Sequence
	EBER1	/5IRD800/ccagctggtacttgaccgaagac
	EBER2	/5IRD700/cagagggattagagaatcctgacttg
CRISPRi sgRNA sequence
	Gene	Sequence
	PUS1	GAGCCTCTCTGGTCCCGACG
	PUS3	CGGCTGCCGGAAAGTAAGTG
	PUS4/TRUB1	GTGCACCTCCACGATGAAAC
	PUS7	AGCGCATCTGGTCCTCCGCG
	PUS7L	GTCGGAGGCTGAAACACTTA
	RPUSD4	CGCCCTTCCTTGTAAGATGG
	DKC1 #1	GTCCTAGCAGCGCGGCCTGA
	DKC1 #2	AGCGCGGCCTGACGGGACCA
q(RT)-PCR primer
	Gene	Forward Primer	Reverse Primer
	GAPDH	AATGACCCCTTCATTGACCTC	TTCCATTGATGACAAGCTTCC
	PUS1	TCAACAGCCACCTTCCCTCTCA	GCAATAGGTCCTGGCATCACATC
	PUS3	GCCAGAGATTATTGATGAGCTGC	CTGGTCATAGATCCACTTGACA
	PUS4/TRUB1	GCTGAATCGGTTGAAGGAGAAG	CGGGCTGCGCTGTCTAGAG
	PUS7	GAAGCATGGACTCACTGAGGCT	GGCTGATCCGTCCATCTTTTCC
	PUS7L	CCTATGGAGCAAGAGTAGTGCAG	CCTCCTCTTCAGTTACCAGGTG
	RPUSD4	AGGTGCTCAGCAGCACTCTC	TTGTGATCACCAAGGATTGGACA
	DKC1	GGCGGATGCGGAAGTAAT	CCACTGAGACGTGTCCAACTT
	EBNA1	GGTCGTGGACGTGGtGAAAA	GGTGGAGACCCGGATGATG
	EBER1	CTACGCTGCCCTAGAGGTTTT	CAGCTGGTACTTGACCGAAGA
	EBER2	CCTAGTGGTTTCGGACACACC	CCTTCTCCCAGAGGGATTAGA
	LMP1	AATTTGCACGGACAGGCATT	AAGGCCAAAAGCTGCCAGAT
	LMP2A	CTCCCTACTCTCCACGGGAT	AGGTAGGGCGCAACAATTACA
	LMP2B	CGGGAGGCCGTGCTTTA	GGCGGTCACAACGGTACTAACT
	UCHL1	AAGGCCAATGTCGGGTAGAT	ATGGTTCACCGGAAAAGGCA
	EBV DS region	ATGTAAATAAAACCGTGACAGCTCAT	TTACCCAACGGGAAGCATATG
	NeoR cassette	TATGACTGGGCACAACAGACA	CAGGTCGGTCTTGACAAAAAG
	ACTIN	GCCATGGTTGTGCCATTACA	GGCCAGGTTCTCTTTTTATTTCTG
Miscellaneous oligo sequences
	Name	Sequence		Application
	3' Linker (RL3)	/5Phos/GUGUCAGUCACUUCCAGCGG-Puromycin		primer extension
	DP3	CCGCTGGAAGTGACTGACAC		primer extension
	KD-ASO EBER2	mG*mU*mC*mG*mG*mU*A*G*C*A*C*C*G*C*A*C*T*G*mA*mG*mC*mG*mU*mU		RNase H digest
	EBER1 ASO	TCACCACCCGGGACTTGTACCCGGGAC/3BioTEG/		Streptavidin bead purification
	EBER2 ASO	CCTGACTTGCAAATGCTCTAGGCG/3BioTEG/		Streptavidin bead purification
	KD-ASO SNORA22 #1	mA*mG*mC*mA*mC*A*C*T*T*G*G*G*T*G*T*T*C*mA*mC*mU*mG*mU		RNase H digest
	KD-ASO SNORA22 #2	mG*mC*mA*mA*mU*G*C*T*C*T*A*G*C*A*C*A*G*mG*mG*mU*mC*mA		RNase H digest
	SNORA22 ASO 1-30	ATAAAGCACACTTGGGTGTTCACTGTGCAA		in vitro RNase H digest
	SNORA22 ASO 21-50	GGGTCAAAGCCAAGGGAACTATAAAGCACA		in vitro RNase H digest
	SNORA22 ASO 41-70	GCAGGCAATGCTCTAGCACAGGGTCAAAGC		in vitro RNase H digest
	SNORA22 ASO 61-90	TTTTAATGCAGAGGAGAAGAGCAGGCAATG		in vitro RNase H digest
	SNORA22 ASO 81-110	TTTAAAAGGATAAATATTCCTTTTAATGCA		in vitro RNase H digest
	SNORA22 ASO 101-134	TAATGTGCTGGCTTTCTGAATACATTTAAAAGGA		in vitro RNase H digest
Antibodies
	Name	Vendor & Cat. No.
	anti-Psi	MBL, D347-3 (clone APU-6)
	anti-DKC1	Santa Cruz, sc-373956 (clone H-3)
	anti-Nucleolin	Abcam, ab13541
	anti-Zebra	rabbit serum, kind gift from Dr. George Miller at Yale University
